# Supplementary material for: Non-cell-autonomous manner of AAV administration to attenuate cardiomyocyte hypertrophy by targeting paracrine signaling on ECM to reduce viral dosage
Source: PubMed Central journal article supplement (PMC8724271; doi:10.1038/s41392-021-00715-z), 2022-01-03
Supplement: 41392_2021_715_MOESM6_ESM.pdf [file 41392_2021_715_MOESM6_ESM.pdf]

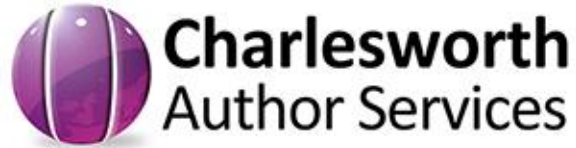

## **EDITORIAL CERTIFICATE**

This document certifies that the manuscript below was edited for correct English language usage, grammar, punctuation and spelling by qualified native English speaking editors at Charlesworth Author Services.

### **Paper Title:**

A modified AAV delivery strategy to attenuate cardiomyocyte hypertrophy with reduced viral dosage via targeting ECM

### **Author:**

Yifei Li

### **Date certificate issued:**

Tuesday 19<sup>th</sup> January, 2021

[www.cwauthors.com](http://www.cwauthors.com)
